# Supplementary material for: Finding of Novel Galactose Utilizing Halomonas sp. YK44 for Polyhydroxybutyrate (PHB) Production
Source: Polymers (Basel). 2022 Dec 10;14(24):5407. doi: 10.3390/polym14245407 (PMC9782037; doi:10.3390/polym14245407)

Supplementary Table

**Table S1.** Species identification using 16S rRNA sequencing and antibiotic resistance the identified strain.

| Strain                                           | 16S rRNA sequencing  |       | Antibiotic resistance |           |            |               |                 |
|--------------------------------------------------|----------------------|-------|-----------------------|-----------|------------|---------------|-----------------|
| <i>H. cerina</i><br>( <i>Halomonas</i> sp. YK44) | Species              | Query | Ampicillin            | Kanamycin | Gentamycin | Spectinomycin | Chloramphenicol |
|                                                  | <i>H. cerina</i> SP4 | 99%   | ++                    | -         | -          | +             | -               |

**Table S2.** Comparison of GPC analysis result *Halomonas* sp. YK44 film and Authentic PHB film.

|                       | M <sub>n</sub>     | M <sub>w</sub>     | PDI  |
|-----------------------|--------------------|--------------------|------|
| Authentic PHB film    | $3.19 \times 10^5$ | $4.29 \times 10^5$ | 1.34 |
| <i>H. cerina</i> film | $6.90 \times 10^5$ | $7.92 \times 10^5$ | 1.15 |

Where M<sub>n</sub>, number average molecular weight; M<sub>w</sub>, weight average molecular weight; PDI, polydispersity index

## Supplementary Figure Legends

**Figure S1.** DSC analysis of PHB from *Halomonas* sp. YK44.

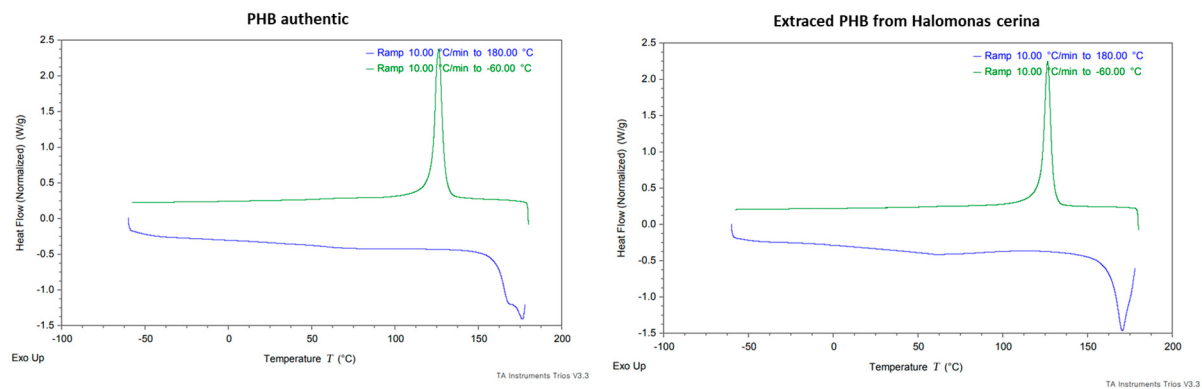

Figure S2. PHB film extracted from *Halomonas* sp. YK44

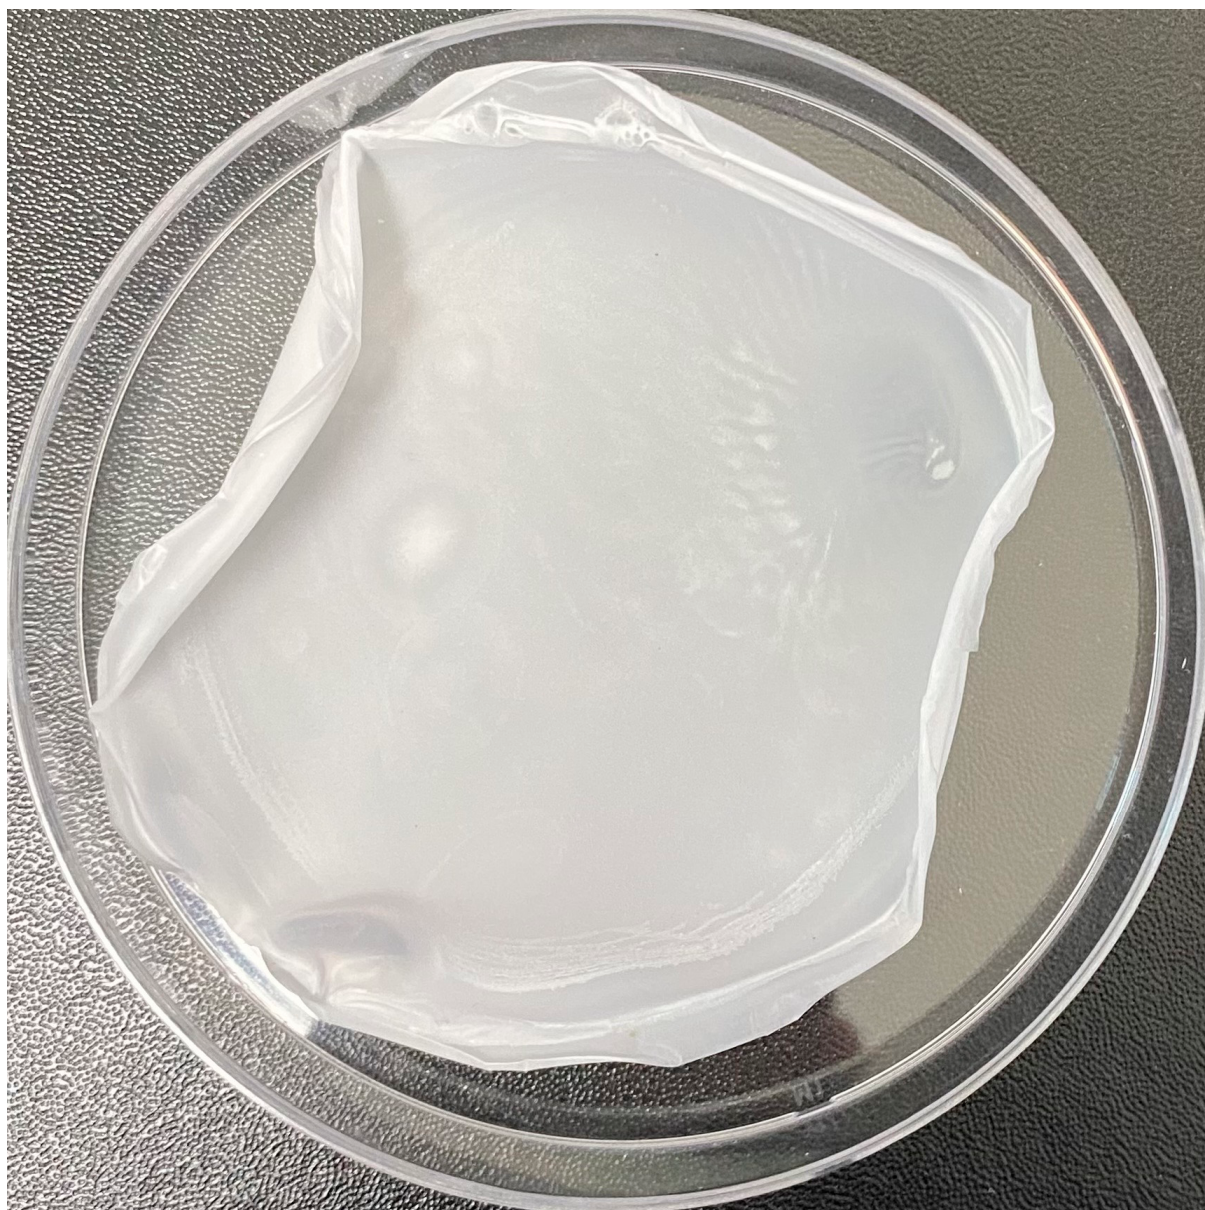

Supplement: Supplementary file 1 [file polymers-14-05407-s001.zip › polymers-2042173-supplementary.pdf]
